# Supplementary material
Source: PubMed Central journal article supplement (PMC5502958)
Supplement: DS_10.1177_0022034517706311.pdf [file DS_10.1177_0022034517706311.pdf]

## The PF4/PPBP/CXCL5 Gene Cluster Is Associated with Periodontitis

A. Shusterman, M. Munz, G. Richter, S. Jepsen, W. Lieb, B. Krone, P. Hoffman, M. Laudes, J. Wellmann, K. Berger, T. Kocher, S. Offenbacher, K. Divaris, A. Franke, S. Schreiber, H. Dommisch, E. Weiss, A.S. Schaefer, Y. Hour-Haddad, and F.A. Iraqi

### Appendix

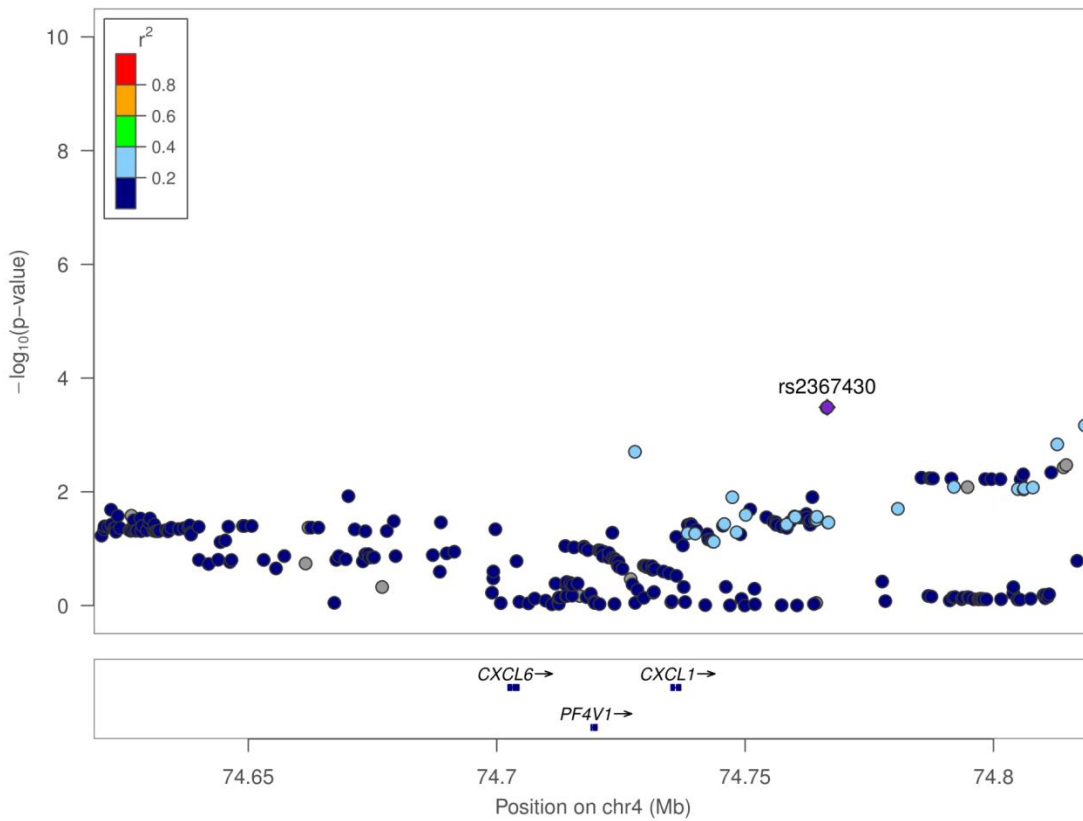

**Appendix Figure.** Association plot with AgP for the genomic region at *PFV1*. *PF4V1* and the adjacent genes *CXCL1* and *-6* show no association with AgP. The  $-\log_{10}$  p-values of the analyzed SNPs were plotted as a function of the genomic SNP position (NCBI build 36, hg19/1000 Genomes 2012, CEU). SNP annotations were generated by LocusZoom.

**Appendix Table.** Summary of illumine base calling and alignments.

| Gene ID            | Name          | Location               | Value 1 | Value2  | log2, fold change | test stats | p_value | q_value |
|--------------------|---------------|------------------------|---------|---------|-------------------|------------|---------|---------|
| ENSMUSG00000026407 | Cacna1s       | 1:136052749-136119822  | 21.734  | 8.175   | -1.411            | -2.423     | 0.00070 | 0.05518 |
| ENSMUSG00000026691 | Fmo3          | 1:162953801-162984528  | 0.713   | 4.360   | 2.612             | 3.356      | 0.00015 | 0.01744 |
| ENSMUSG00000042686 | Jph1          | 1:16994937-17097889    | 4.967   | 2.202   | -1.174            | -2.919     | 0.00060 | 0.04994 |
| ENSMUSG00000007122 | Casq1         | 1:172209893-172219868  | 49.357  | 13.029  | -1.922            | -4.775     | 0.00005 | 0.00719 |
| ENSMUSG00000079588 | Tmem182       | 1:40805600-40855944    | 8.593   | 2.844   | -1.596            | -3.426     | 0.00030 | 0.03074 |
| ENSMUSG00000082209 | Eif4a-ps4     | 1:60703917-60705656    | 10.115  | 0.267   | -5.243            | -5.127     | 0.00030 | 0.03074 |
| ENSMUSG00000061816 | Myl1          | 1:66924294-66945404    | 718.167 | 232.166 | -1.629            | -4.860     | 0.00005 | 0.00719 |
| ENSMUSG00000026208 | Des           | 1:75360328-75375012    | 90.506  | 40.440  | -1.162            | -3.071     | 0.00005 | 0.00719 |
| ENSMUSG00000055866 | Per2          | 1:91415983-91459330    | 11.875  | 20.675  | 0.800             | 2.338      | 0.00110 | 0.07610 |
| ENSMUSG00000039891 | Txlnb         | 10:17790521-17845665   | 9.364   | 3.798   | -1.302            | -3.197     | 0.00005 | 0.00719 |
| ENSMUSG00000019787 | Trdn          | 10:33083482-33476709   | 11.240  | 3.483   | -1.690            | -4.418     | 0.00005 | 0.00719 |
| ENSMUSG00000020331 | Hcn2          | 10:79716633-79736108   | 0.525   | 2.204   | 2.071             | 2.645      | 0.00145 | 0.09251 |
| ENSMUSG00000020038 | Cry1          | 10:85131701-85185054   | 4.175   | 10.333  | 1.307             | 3.495      | 0.00005 | 0.00719 |
| ENSMUSG00000020722 | Cacng1        | 11:107703217-107716522 | 15.432  | 4.204   | -1.876            | -4.178     | 0.00005 | 0.00719 |
| ENSMUSG00000034227 | Foxj1         | 11:116330703-116335399 | 2.864   | 9.582   | 1.742             | 3.769      | 0.00005 | 0.00719 |
| ENSMUSG00000054986 | Sec14l3       | 11:4064840-4077736     | 2.468   | 27.186  | 3.461             | 4.076      | 0.00005 | 0.00719 |
| ENSMUSG00000061462 | Obscn         | 11:58994255-59136402   | 17.902  | 8.959   | -0.999            | -2.183     | 0.00140 | 0.09073 |
| ENSMUSG00000056598 | Lrrc48        | 11:60353328-60394341   | 2.061   | 6.791   | 1.720             | 2.996      | 0.00020 | 0.02186 |
| ENSMUSG00000087410 | 2310065F04Rik | 11:67112460-67120080   | 4.550   | 0.677   | -2.748            | -3.010     | 0.00065 | 0.05250 |
| ENSMUSG00000018566 | Slc2a4        | 11:69942538-69948188   | 21.504  | 10.248  | -1.069            | -2.639     | 0.00050 | 0.04408 |
| ENSMUSG00000020839 | Tmigd1        | 11:76902158-76916587   | 14.073  | 4.736   | -1.571            | -2.558     | 0.00095 | 0.06862 |
| ENSMUSG00000093483 | AA465934      | 11:83291698-83294632   | 40.468  | 8.342   | -2.278            | -3.109     | 0.00030 | 0.03074 |

|                    |               |                        |         |         |        |        |         |         |
|--------------------|---------------|------------------------|---------|---------|--------|--------|---------|---------|
| ENSMUSG00000038756 | Ttl6          | 11:96133785-96165451   | 0.463   | 3.976   | 3.103  | 4.202  | 0.00015 | 0.01744 |
| ENSMUSG00000007877 | Tcap          | 11:98383810-98384953   | 395.954 | 159.427 | -1.312 | -4.080 | 0.00005 | 0.00719 |
| ENSMUSG00000020889 | Nr1d1         | 11:98740637-98775333   | 127.199 | 46.096  | -1.464 | -2.825 | 0.00005 | 0.00719 |
| ENSMUSG00000021194 | Chga          | 12:102554968-102565027 | 1.731   | 18.743  | 3.437  | 6.084  | 0.00005 | 0.00719 |
| ENSMUSG00000011148 | Adssl1        | 12:112620044-112641354 | 40.189  | 21.023  | -0.935 | -2.707 | 0.00010 | 0.01271 |
| ENSMUSG00000071398 | 2410004P03Rik | 12:17004957-17011727   | 1.438   | 5.114   | 1.830  | 2.988  | 0.00100 | 0.07160 |
| ENSMUSG00000021087 | Rtn1          | 12:72211751-72409054   | 3.409   | 12.147  | 1.833  | 2.835  | 0.00010 | 0.01271 |
| ENSMUSG00000052374 | Actn2         | 13:12269425-12340760   | 38.586  | 21.081  | -0.872 | -2.549 | 0.00055 | 0.04672 |
| ENSMUSG00000021319 | Sfrp4         | 13:19623174-19632821   | 27.219  | 48.059  | 0.820  | 2.626  | 0.00080 | 0.06073 |
| ENSMUSG00000021373 | Cap2          | 13:46501847-46649642   | 9.817   | 3.629   | -1.436 | -2.505 | 0.00040 | 0.03791 |
| ENSMUSG00000047419 | Cmya5         | 13:93040712-93144724   | 10.456  | 4.002   | -1.386 | -3.767 | 0.00005 | 0.00719 |
| ENSMUSG00000068697 | Myoz1         | 14:20649101-20656540   | 86.321  | 21.851  | -1.982 | -5.987 | 0.00005 | 0.00719 |
| ENSMUSG00000039376 | Synpo2l       | 14:20658945-20668354   | 4.544   | 1.626   | -1.483 | -2.969 | 0.00015 | 0.01744 |
| ENSMUSG00000071540 | 3425401B19Rik | 14:32659118-32685272   | 4.564   | 1.423   | -1.682 | -3.601 | 0.00005 | 0.00719 |
| ENSMUSG00000021798 | Ldb3          | 14:34526698-34588681   | 39.153  | 15.118  | -1.373 | -3.448 | 0.00005 | 0.00719 |
| ENSMUSG00000072601 | Ear1          | 14:43818764-43875517   | 7.832   | 23.142  | 1.563  | 2.964  | 0.00035 | 0.03436 |
| ENSMUSG00000062148 | Ear6          | 14:51853698-51854643   | 14.399  | 35.960  | 1.320  | 2.666  | 0.00035 | 0.03436 |
| ENSMUSG00000018893 | Mb            | 15:77015488-77057107   | 575.177 | 225.241 | -1.353 | -3.350 | 0.00005 | 0.00719 |
| ENSMUSG00000005716 | Pvalb         | 15:78191113-78206400   | 153.991 | 21.751  | -2.824 | -7.041 | 0.00005 | 0.00719 |
| ENSMUSG00000022619 | Mapk8ip2      | 15:89453912-89464468   | 0.256   | 2.661   | 3.380  | 2.153  | 0.00005 | 0.00719 |
| ENSMUSG00000037579 | Kcnh3         | 15:99224975-99242817   | 0.400   | 2.045   | 2.354  | 3.139  | 0.00085 | 0.06335 |
| ENSMUSG00000023011 | Faim2         | 15:99497004-99528017   | 0.741   | 5.091   | 2.780  | 5.093  | 0.00005 | 0.00719 |
| ENSMUSG00000033383 | Rtp1          | 16:23429132-23433960   | 0.360   | 4.927   | 3.775  | 4.859  | 0.00005 | 0.00719 |

|                    |          |                       |         |         |        |        |         |         |
|--------------------|----------|-----------------------|---------|---------|--------|--------|---------|---------|
| ENSMUSG00000047531 | Rtp2     | 16:23925547-23930787  | 0.337   | 3.911   | 3.537  | 4.077  | 0.00055 | 0.04672 |
| ENSMUSG00000008658 | Rbfox1   | 16:6809221-7412479    | 3.874   | 1.134   | -1.773 | -2.962 | 0.00005 | 0.00719 |
| ENSMUSG00000040666 | Sh3bgr   | 16:96200469-96228933  | 51.102  | 19.172  | -1.414 | -2.540 | 0.00035 | 0.03436 |
| ENSMUSG00000002500 | Rpl3l    | 17:24727819-24736143  | 28.551  | 14.058  | -1.022 | -2.568 | 0.00015 | 0.01744 |
| ENSMUSG00000041062 | Mslnl    | 17:25736039-25748330  | 0.339   | 5.282   | 3.961  | 4.812  | 0.00015 | 0.01744 |
| ENSMUSG00000024033 | Rsph1    | 17:31255018-31277356  | 4.204   | 12.485  | 1.570  | 3.141  | 0.00035 | 0.03436 |
| ENSMUSG00000024298 | Zfp871   | 17:32771235-32788287  | 2.232   | 0.824   | -1.437 | -2.345 | 0.00150 | 0.09423 |
| ENSMUSG00000002289 | Angptl4  | 17:33773749-33781575  | 10.651  | 21.913  | 1.041  | 2.500  | 0.00030 | 0.03074 |
| ENSMUSG00000040694 | Apobec2  | 17:48419230-48432728  | 32.790  | 10.702  | -1.615 | -4.411 | 0.00005 | 0.00719 |
| ENSMUSG00000045761 | Fam179a  | 17:71673260-71729669  | 3.227   | 7.066   | 1.131  | 2.322  | 0.00125 | 0.08231 |
| ENSMUSG00000033966 | Cdkl4    | 17:80523549-80563834  | 0.310   | 2.049   | 2.725  | 3.418  | 0.00070 | 0.05518 |
| ENSMUSG00000024471 | Myot     | 18:44334073-44355724  | 43.161  | 19.328  | -1.159 | -3.334 | 0.00005 | 0.00719 |
| ENSMUSG00000024524 | Gnal     | 18:67088335-67245830  | 1.910   | 11.019  | 2.529  | 4.656  | 0.00005 | 0.00719 |
| ENSMUSG00000024743 | Syt7     | 19:10389089-10453181  | 0.480   | 1.569   | 1.708  | 2.790  | 0.00050 | 0.04408 |
| ENSMUSG00000033863 | Klf9     | 19:23141225-23166911  | 36.241  | 20.087  | -0.851 | -2.466 | 0.00045 | 0.04032 |
| ENSMUSG00000075289 | Carns1   | 19:4164323-4175479    | 4.467   | 9.288   | 1.056  | 2.661  | 0.00065 | 0.05250 |
| ENSMUSG00000049134 | Nrap     | 19:56287136-56390037  | 12.737  | 6.077   | -1.068 | -2.695 | 0.00005 | 0.00719 |
| ENSMUSG00000042179 | Pnliprp1 | 19:58728886-58744169  | 109.166 | 26.743  | -2.029 | -5.419 | 0.00005 | 0.00719 |
| ENSMUSG00000017817 | Jph2     | 2:163336241-163397993 | 6.251   | 2.440   | -1.357 | -3.114 | 0.00020 | 0.02186 |
| ENSMUSG00000017300 | Tnnc2    | 2:164769897-164779967 | 672.302 | 264.126 | -1.348 | -3.101 | 0.00005 | 0.00719 |
| ENSMUSG00000039155 | Cdh26    | 2:178430530-178487366 | 1.852   | 6.862   | 1.890  | 3.222  | 0.00005 | 0.00719 |
| ENSMUSG00000016349 | Eef1a2   | 2:181147652-181157014 | 53.511  | 24.882  | -1.105 | -3.502 | 0.00005 | 0.00719 |
| ENSMUSG00000026880 | Stom     | 2:35313985-35336976   | 24.803  | 47.834  | 0.947  | 3.074  | 0.00010 | 0.01271 |

|                    |               |                       |         |         |        |        |         |         |
|--------------------|---------------|-----------------------|---------|---------|--------|--------|---------|---------|
| ENSMUSG00000026950 | Neb           | 2:52136646-52338798   | 111.187 | 38.261  | -1.539 | -3.268 | 0.00005 | 0.00719 |
| ENSMUSG00000027022 | Xirp2         | 2:67446001-67526614   | 7.969   | 3.101   | -1.362 | -3.760 | 0.00005 | 0.00719 |
| ENSMUSG00000075307 | Klhl41        | 2:69670119-69684230   | 25.218  | 10.367  | -1.282 | -3.874 | 0.00005 | 0.00719 |
| ENSMUSG00000027073 | Prg2          | 2:84980460-84983632   | 91.222  | 234.501 | 1.362  | 4.792  | 0.00005 | 0.00719 |
| ENSMUSG00000027895 | Kcnc4         | 3:107438302-107458898 | 1.694   | 4.573   | 1.433  | 2.866  | 0.00080 | 0.06073 |
| ENSMUSG00000040562 | Gstm2         | 3:107981701-107986453 | 60.296  | 112.684 | 0.902  | 2.596  | 0.00005 | 0.00719 |
| ENSMUSG00000027887 | Sypl2         | 3:108211471-108226648 | 8.527   | 3.234   | -1.399 | -3.071 | 0.00005 | 0.00719 |
| ENSMUSG00000033400 | Agl           | 3:116739998-116808166 | 12.852  | 6.316   | -1.025 | -2.527 | 0.00085 | 0.06335 |
| ENSMUSG00000090066 | 1110002E22Rik | 3:138048760-138081506 | 1.660   | 0.475   | -1.806 | -2.357 | 0.00040 | 0.03791 |
| ENSMUSG00000027744 | Stoml3        | 3:53488726-53508502   | 4.582   | 55.750  | 3.605  | 7.557  | 0.00005 | 0.00719 |
| ENSMUSG00000098912 | RP23-199B2.4  | 3:88775215-88832547   | 3.071   | 0.480   | -2.676 | -2.383 | 0.00065 | 0.05250 |
| ENSMUSG00000027932 | Slc27a3       | 3:90385238-90389938   | 2.033   | 7.039   | 1.792  | 2.593  | 0.00070 | 0.05518 |
| ENSMUSG00000042250 | Pglyrp4       | 3:90726905-90741517   | 4.230   | 0.260   | -4.024 | -3.963 | 0.00070 | 0.05518 |
| ENSMUSG00000038550 | Gm129         | 3:95871521-95892005   | 28.204  | 12.574  | -1.165 | -2.858 | 0.00145 | 0.09251 |
| ENSMUSG00000068854 | Hist2h2be     | 3:96221120-96223738   | 2.420   | 9.708   | 2.004  | 4.718  | 0.00005 | 0.00719 |
| ENSMUSG00000038403 | Hfe2          | 3:96525184-96529216   | 15.510  | 4.839   | -1.680 | -4.273 | 0.00005 | 0.00719 |
| ENSMUSG00000032643 | Fhl3          | 4:124700700-124708611 | 30.323  | 12.460  | -1.283 | -3.277 | 0.00005 | 0.00719 |
| ENSMUSG00000037139 | Myom3         | 4:135759714-135815564 | 7.233   | 2.670   | -1.438 | -2.839 | 0.00010 | 0.01271 |
| ENSMUSG00000086549 | Gm13648       | 4:156034839-156059802 | 4.287   | 12.422  | 1.535  | 2.780  | 0.00095 | 0.06862 |
| ENSMUSG00000028294 | 1700003M02Rik | 4:34688558-34730206   | 0.727   | 3.904   | 2.425  | 2.296  | 0.00055 | 0.04672 |
| ENSMUSG00000028441 | 1110017D15Rik | 4:41505008-41517333   | 4.055   | 15.498  | 1.934  | 2.368  | 0.00150 | 0.09423 |
| ENSMUSG00000073102 | Drc1          | 5:30281387-30366708   | 0.784   | 3.301   | 2.075  | 2.951  | 0.00120 | 0.08031 |
| ENSMUSG00000062077 | Trim54        | 5:31116711-31137630   | 12.031  | 4.400   | -1.451 | -2.920 | 0.00095 | 0.06862 |

|                    |          |                       |          |         |        |        |         |         |
|--------------------|----------|-----------------------|----------|---------|--------|--------|---------|---------|
| ENSMUSG00000063646 | Jakmip1  | 5:37028334-37148001   | 0.973    | 4.212   | 2.114  | 1.744  | 0.00105 | 0.07357 |
| ENSMUSG00000029268 | Ugt2a1   | 5:87459489-87490871   | 2.147    | 32.384  | 3.915  | 6.222  | 0.00005 | 0.00719 |
| ENSMUSG00000029273 | Sult1d1  | 5:87554644-87569027   | 0.421    | 4.205   | 3.321  | 2.780  | 0.00060 | 0.04994 |
| ENSMUSG00000029373 | Pf4      | 5:90772434-90773381   | 72.774   | 129.142 | 0.827  | 3.564  | 0.00155 | 0.09590 |
| ENSMUSG00000030110 | Ret      | 6:118151747-118197744 | 1.742    | 0.671   | -1.377 | -2.503 | 0.00125 | 0.08231 |
| ENSMUSG00000047228 | BC048546 | 6:128539821-128581606 | 140.424  | 29.632  | -2.245 | -4.535 | 0.00005 | 0.00719 |
| ENSMUSG00000042717 | Ppp1r3a  | 6:14713821-14755274   | 3.575    | 1.038   | -1.784 | -4.076 | 0.00005 | 0.00719 |
| ENSMUSG00000029683 | Lmod2    | 6:24597770-24605414   | 21.356   | 8.389   | -1.348 | -3.558 | 0.00005 | 0.00719 |
| ENSMUSG00000004347 | Pde1c    | 6:56069820-56369634   | 0.812    | 3.257   | 2.004  | 3.389  | 0.00005 | 0.00719 |
| ENSMUSG00000044086 | Lmod3    | 6:97238527-97252780   | 5.799    | 2.313   | -1.326 | -2.432 | 0.00090 | 0.06647 |
| ENSMUSG00000030996 | Art1     | 7:102096878-102111148 | 29.924   | 12.777  | -1.228 | -2.984 | 0.00005 | 0.00719 |
| ENSMUSG00000030897 | Cnga4    | 7:105404567-105408738 | 0.357    | 5.207   | 3.867  | 4.751  | 0.00020 | 0.02186 |
| ENSMUSG00000031026 | Trim66   | 7:109449005-109508134 | 0.108    | 1.475   | 3.765  | 2.107  | 0.00005 | 0.00719 |
| ENSMUSG00000030672 | Mylpf    | 7:127211607-127214298 | 1266.740 | 492.558 | -1.363 | -3.770 | 0.00070 | 0.05518 |
| ENSMUSG00000042828 | Trim72   | 7:128002848-128011393 | 9.601    | 4.714   | -1.026 | -2.350 | 0.00130 | 0.08492 |
| ENSMUSG00000030785 | Cox6a2   | 7:128154375-128223816 | 136.454  | 65.121  | -1.067 | -2.954 | 0.00005 | 0.00719 |
| ENSMUSG00000038801 | Scgb1c1  | 7:140845564-140846768 | 12.860   | 76.515  | 2.573  | 7.406  | 0.00005 | 0.00719 |
| ENSMUSG00000025488 | Cox8b    | 7:140898942-140900446 | 200.858  | 109.052 | -0.881 | -4.873 | 0.00140 | 0.09073 |
| ENSMUSG00000025515 | Muc2     | 7:141746831-141754690 | 0.485    | 3.538   | 2.866  | 3.641  | 0.00040 | 0.03791 |
| ENSMUSG00000031097 | Tnni2    | 7:142441807-142444410 | 624.654  | 238.042 | -1.392 | -3.336 | 0.00005 | 0.00719 |
| ENSMUSG00000061723 | Tnnt3    | 7:142460808-142516009 | 835.862  | 289.943 | -1.527 | -2.394 | 0.00105 | 0.07357 |
| ENSMUSG00000087090 | Nctc1    | 7:142544608-142558596 | 3.531    | 0.983   | -1.844 | -2.673 | 0.00105 | 0.07357 |
| ENSMUSG00000030401 | Rtn2     | 7:19282661-19296164   | 42.636   | 21.444  | -0.991 | -2.581 | 0.00055 | 0.04672 |

|                    |          |                       |        |        |        |        |         |         |
|--------------------|----------|-----------------------|--------|--------|--------|--------|---------|---------|
| ENSMUSG00000049685 | Cyp2g1   | 7:26808926-26821197   | 2.810  | 44.860 | 3.997  | 8.174  | 0.00005 | 0.00719 |
| ENSMUSG00000030592 | Ryr1     | 7:29003339-29125151   | 11.401 | 4.075  | -1.484 | -4.133 | 0.00005 | 0.00719 |
| ENSMUSG00000006651 | Aplp1    | 7:30434980-30445582   | 8.682  | 17.559 | 1.016  | 2.863  | 0.00030 | 0.03074 |
| ENSMUSG00000036915 | Kirrel2  | 7:30447533-30457690   | 0.401  | 12.233 | 4.932  | 1.729  | 0.00010 | 0.01271 |
| ENSMUSG00000066584 | Scgb2b27 | 7:34011931-34013942   | 38.280 | 5.572  | -2.780 | -3.808 | 0.00030 | 0.03074 |
| ENSMUSG00000038670 | Mybpc2   | 7:44501698-44524669   | 29.459 | 6.822  | -2.111 | -5.628 | 0.00005 | 0.00719 |
| ENSMUSG00000095276 | Gm581    | 7:45176348-45179597   | 3.136  | 38.749 | 3.627  | 7.574  | 0.00005 | 0.00719 |
| ENSMUSG00000038201 | Kcna7    | 7:45405959-45411382   | 3.178  | 1.106  | -1.523 | -2.765 | 0.00120 | 0.08031 |
| ENSMUSG00000030433 | Sbk2     | 7:4956133-4964390     | 10.010 | 2.423  | -2.047 | -3.166 | 0.00020 | 0.02186 |
| ENSMUSG00000055489 | Ano5     | 7:51511028-51598709   | 1.452  | 0.495  | -1.553 | -2.860 | 0.00075 | 0.05828 |
| ENSMUSG00000038663 | Fsd2     | 7:81533307-81566944   | 3.450  | 1.166  | -1.565 | -2.894 | 0.00045 | 0.04032 |
| ENSMUSG00000049791 | Fzd4     | 7:89404365-89410110   | 5.806  | 2.655  | -1.129 | -2.729 | 0.00075 | 0.05828 |
| ENSMUSG00000062826 | Ces2f    | 8:104947355-104955962 | 8.207  | 3.307  | -1.311 | -2.766 | 0.00120 | 0.08031 |
| ENSMUSG00000060019 | Gm10073  | 8:106572965-106573461 | 57.321 | 17.529 | -1.709 | -5.388 | 0.00010 | 0.01271 |
| ENSMUSG00000034467 | Dynlrb2  | 8:116505014-116515896 | 7.594  | 28.043 | 1.885  | 4.446  | 0.00110 | 0.07610 |
| ENSMUSG00000031980 | Agt      | 8:124556533-124569706 | 7.583  | 2.522  | -1.588 | -3.128 | 0.00015 | 0.01744 |
| ENSMUSG00000031530 | Dusp4    | 8:34807296-34819894   | 8.074  | 3.856  | -1.066 | -2.594 | 0.00155 | 0.09590 |
| ENSMUSG00000031791 | Tmem38a  | 8:72572102-72587282   | 37.991 | 21.692 | -0.808 | -2.598 | 0.00100 | 0.07160 |
| ENSMUSG00000002190 | Clgn     | 8:83389866-83428552   | 0.284  | 2.891  | 3.348  | 3.814  | 0.00020 | 0.02186 |
| ENSMUSG00000043154 | Ppp2r3a  | 9:101104991-101251832 | 11.296 | 6.167  | -0.873 | -2.389 | 0.00080 | 0.06073 |
| ENSMUSG00000003410 | Elavl3   | 9:22015004-22052023   | 0.226  | 1.952  | 3.112  | 3.811  | 0.00035 | 0.03436 |
| ENSMUSG00000049281 | Scn3b    | 9:40269215-40291618   | 0.231  | 1.542  | 2.736  | 1.491  | 0.00055 | 0.04672 |
| ENSMUSG00000070306 | Ccdc153  | 9:44240676-44247306   | 4.212  | 12.842 | 1.608  | 3.200  | 0.00120 | 0.08031 |



|                    |          |                       |         |        |        |        |         |         |
|--------------------|----------|-----------------------|---------|--------|--------|--------|---------|---------|
| ENSMUSG00000044938 | Klhl31   | 9:77636499-77660127   | 3.026   | 0.958  | -1.660 | -3.626 | 0.00010 | 0.01271 |
| ENSMUSG00000032452 | Clstn2   | 9:97444394-98033181   | 0.312   | 2.209  | 2.825  | 3.706  | 0.00015 | 0.01744 |
| ENSMUSG00000031312 | Itgb1bp2 | X:101449087-101453541 | 13.070  | 5.560  | -1.233 | -2.344 | 0.00145 | 0.09251 |
| ENSMUSG00000023092 | Fhl1     | X:56731786-56793346   | 135.019 | 64.140 | -1.074 | -2.618 | 0.00045 | 0.04032 |
| ENSMUSG00000082635 | Gm14750  | X:77988362-77992734   | 53.173  | 12.887 | -2.045 | -5.500 | 0.00010 | 0.01271 |
|                    |          |                       |         |        |        |        |         |         |

#### **Supplement materials\_Description of the study population**

(1) **AgP (Germany).** The AgP patients were recruited from throughout Germany and Vienna, Austria and were described before (Schaefer et al. 2015). In brief, inclusion criteria for the AgP cases were no diabetes and >30% alveolar bone loss under the age of 36 years (mean age, 32; age range 18-35), documented by dental radiographs (N=717 AgP patients, 302 males and 415 females). The AgP control sample consisted of 4,213 controls (2,018 males, 2,191 females, four unknown, mean age=57 years, age range: 19-82) from North- and West-Germany. They were recruited from the Competence Network "FoCus - Food Chain Plus" (Muller et al. 2015), the Dortmund Health Study (DHS) (Berger 2012) and the Heinz Nixdorf Recall Studies 1-3 (HNR1-3) (Schmermund et al. 2002).

**CP (USA).** The American CP cohort was used as described in (Divaris et al. 2012) and consisted of European American participants of the Dental Atherosclerosis Risk In Communities (ARIC) study with moderate CP (n=1,961 cases; 939 females, 1,022 males; mean age=63 years) and

severe CP (n=785 cases; 279 females, 506 males; mean age=64 years). Individuals who were periodontally-healthy or had mild periodontitis were used as controls (N=1,864 controls; 1,197 females, 667 males; mean age=62 years) (The atherosclerosis risk in communities (aric) study: Design and objectives. The aric investigators 1989).

**CP (Germany).** The German CP cases and controls were first described in (Schaefer et al. 2011). 399 cases (157 males, 242 females, mean age at first diagnosis=60 years, age range: 36-59), which had >50% bone loss at  $\geq 7$  teeth sites diagnosed < the age of 60 years were included in this study. The controls (N=1,633, 932 males, 687 females, 14 unknown, mean age of blood donation=58 years, age range: 34-77) consisted of 728 population-representative controls (SPC) and 553 blood donors (BSP), which were collected in North-Germany at the Biobank popgen (Kiel, Germany) and an additional sample of 352 blood donors from Bavaria (Munich, Germany), which were diagnosed to be free of periodontitis.

### **Supplement material 1**

#### Summary of illumine base calling and alignments

| <b>Genotype</b>        |                                          | <b>Susc.1</b> | <b>Susc.2</b> | <b>Susc.3</b> | <b>Susc.4</b> | <b>Resis.1</b> | <b>Resis.2</b> | <b>Resis.3</b> | <b>Resis.4</b> |
|------------------------|------------------------------------------|---------------|---------------|---------------|---------------|----------------|----------------|----------------|----------------|
| <b>Raw</b>             | <i>RIN</i>                               | 7.6           | 7.1           | 7.3           | 7             | 8.1            | 7.9            | 7.4            | 6.3            |
|                        | <i>Gender</i>                            | M             | M             | M             | M             | M              | F              | M              | F              |
|                        | <i>Total number of sequences</i>         | 20875025      | 21965937      | 21987585      | 22252577      | 22715559       | 23622044       | 20692167       | 22858649       |
| <b>g and Filtering</b> | <i>Sequences after quality filtering</i> | 18393145      | 19337466      | 19159466      | 19780962      | 19936553       | 20643897       | 18330333       | 20203438       |
|                        | <i>Percent of bad quality</i>            | 11.89         | 11.97         | 12.86         | 11.11         | 12.23          | 12.61          | 11.41          | 11.62          |
| <b>Mapping</b>         | <i>Total aligned sequences</i>           | 18062361      | 19034898      | 18760038      | 19541772      | 19599315       | 20372563       | 18133993       | 19941773       |
|                        | <i>Percent aligned</i>                   | 98.20         | 98.44         | 97.92         | 98.79         | 98.31          | 98.69          | 98.93          | 98.70          |

|                   |                                                    |          |          |          |          |          |          |          |          |
|-------------------|----------------------------------------------------|----------|----------|----------|----------|----------|----------|----------|----------|
| <b>Annotation</b> | <i>Ensemble gene reads</i>                         | 14270908 | 13995971 | 14770085 | 12260846 | 14819587 | 17001896 | 11363602 | 14914419 |
|                   | <i>Ambiguous reads</i>                             | 300035   | 272449   | 304427   | 201377   | 288014   | 329778   | 186175   | 277017   |
|                   | <i>No feature reads</i>                            | 1422505  | 1291706  | 1623479  | 1005522  | 1484980  | 1406996  | 836647   | 1239549  |
|                   | <i>Ensemble genes with coverage of at least 10</i> | 15414    | 15451    | 16423    | 15434    | 16153    | 15729    | 15394    | 15858    |

Libraries of cDNA (four resistant and four susceptible) were sequenced together to obtain around 20 million raw sequence reads per sample. These reads then passed cleaning and filtering, before mapping onto the genome.

The eight samples were sequenced together on the same lane of the Illumina GAllx flow. We chose only four of the samples for the next analysis (susc. 2, susc. 4 and resis. 1, resis 3).

Sus. = susceptible mouse phenotype from the F2 population.

Res. = resistant mouse phenotype from the F2 population.
